# Supplementary material
Source: Royal Society of Chemistry journal article supplement (doi:10.1039/d6ta00581k)
Supplement: d6ta00581k1.pdf [file d6ta00581k1.pdf]

Supporting information

## **Laser-fabricated sandwiched fog collector enabling agricultural irrigation and electricity generation**

Xinran Dong<sup>1#</sup>, Jinghui Gao<sup>1#</sup>, Yan Zhang<sup>1</sup>, Yuxin Song<sup>2\*</sup>, Longhui Huang<sup>1</sup>, Hong Luo<sup>1</sup>,  
Xiongfeng Zhou<sup>1</sup>, Cong Wang<sup>3</sup>, Ji-an Duan<sup>3</sup>, and Minjie Liu<sup>4</sup>

<sup>1</sup>College of Mechanical and Intelligent Manufacturing, Central South University of Forestry and Technology, 498 South Shaoshan Street, Changsha 410004, China

<sup>2</sup>Department of Mechanical Engineering, The Hong Kong Polytechnic University, Hung Hom, Kowloon, Hong Kong, 100872, China

<sup>3</sup>State Key Laboratory of Precision Manufacturing for Extreme Service Performance, College of Mechanical and Electrical Engineering, Central South University, 932 South Lushan Street, Changsha, 410083, China

<sup>4</sup>School of Mechanical Engineering, Tiangong University, 399 Binshui West Road, Tianjin 300387, China

#These authors contributed equally: Xinran Dong, Jinghui Gao;

\*Corresponding author: [yxsong6@outlook.com](mailto:yxsong6@outlook.com)

### **This file includes**

|                                |    |
|--------------------------------|----|
| Supplementary Figure S1-9..... | 2  |
| Supplementary Table S1-2.....  | 11 |
| Supplementary Video S1-2 ..... | 13 |

## Supplementary Figure S1-7

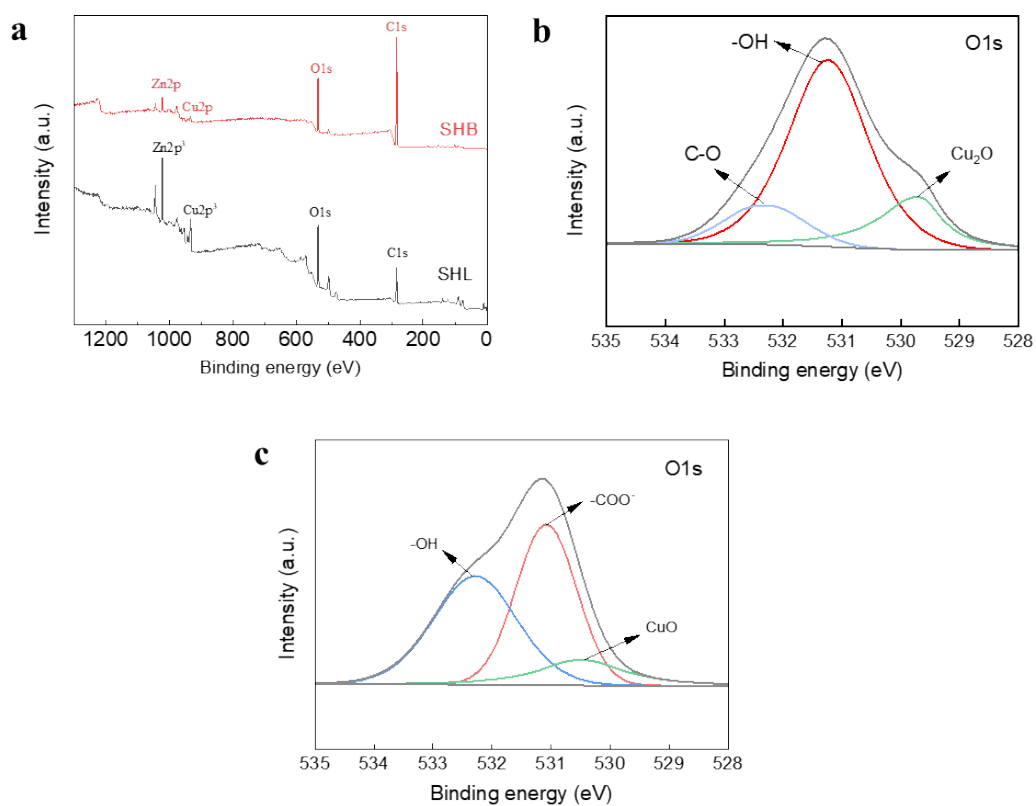

**Figure S1.** (a) XPS spectrums of the SHL and SHB meshes. (b) High-resolution XPS spectrum of O1s for the SHL mesh. (c) High-resolution XPS spectrum of O1s for the SHB mesh.

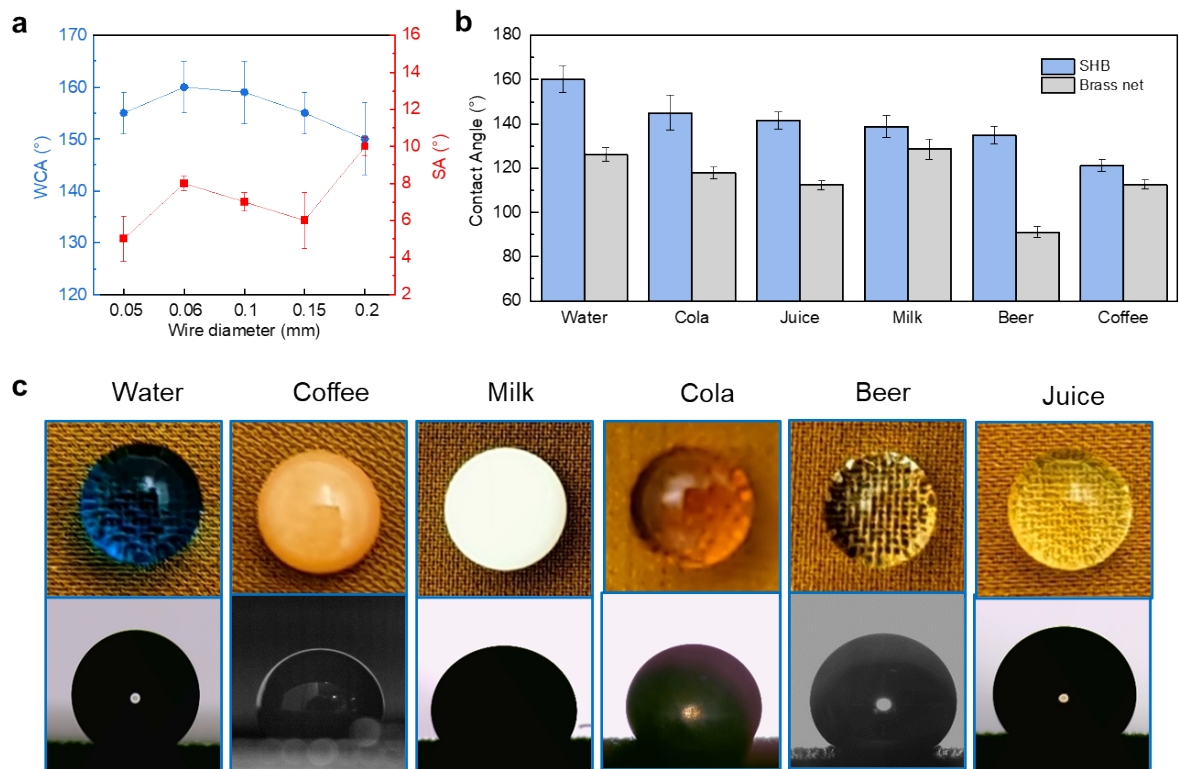

**Figure S2.** (a) Water contact angles (WCAs) and sliding angles (SAs) of the SHB meshes with different wire diameters. (b) Contact angles of different liquids on the SHB mesh. (c) Optical images of different liquids on the SHB mesh.

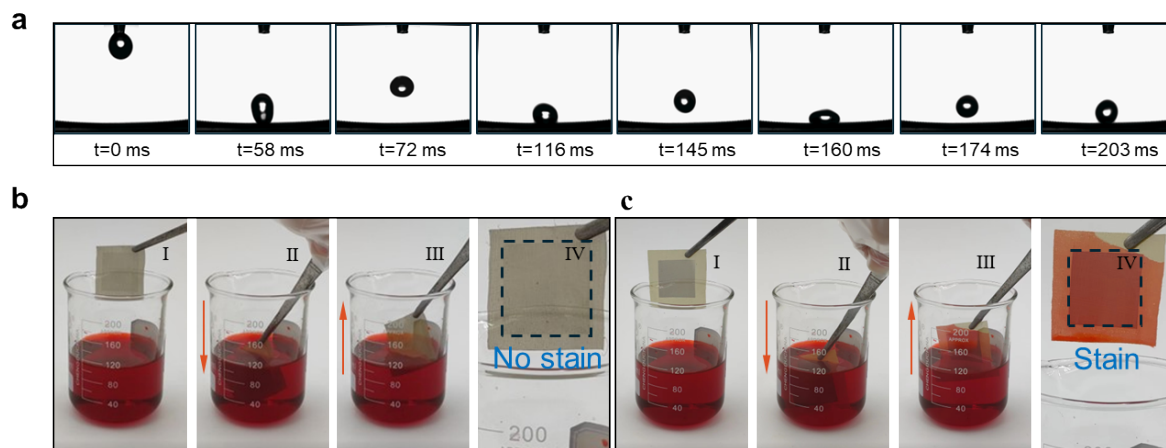

**Figure S3.** (a) Dynamics of droplet rebound on the SHB mesh. (b) Water soaking tests of SHL mesh. (c) Water soaking tests of SHB mesh.

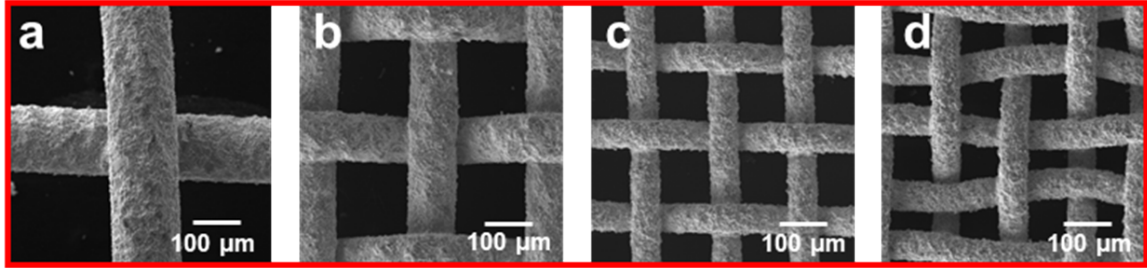

**Figure S4.** SEM images of meshes with different wire diameters (a) 0.15 mm (Mesh number: 50), (b) 0.10 mm (Mesh number: 100), (c) 0.06 mm (Mesh number: 150), (d) 0.05 mm (Mesh number: 200).

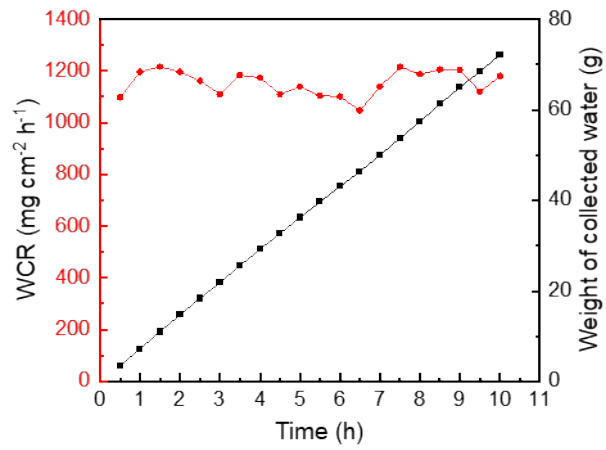

**Figure S5.** Water collection rate (WCR) and weight of collected water of the large-scale sandwiched fog collector.

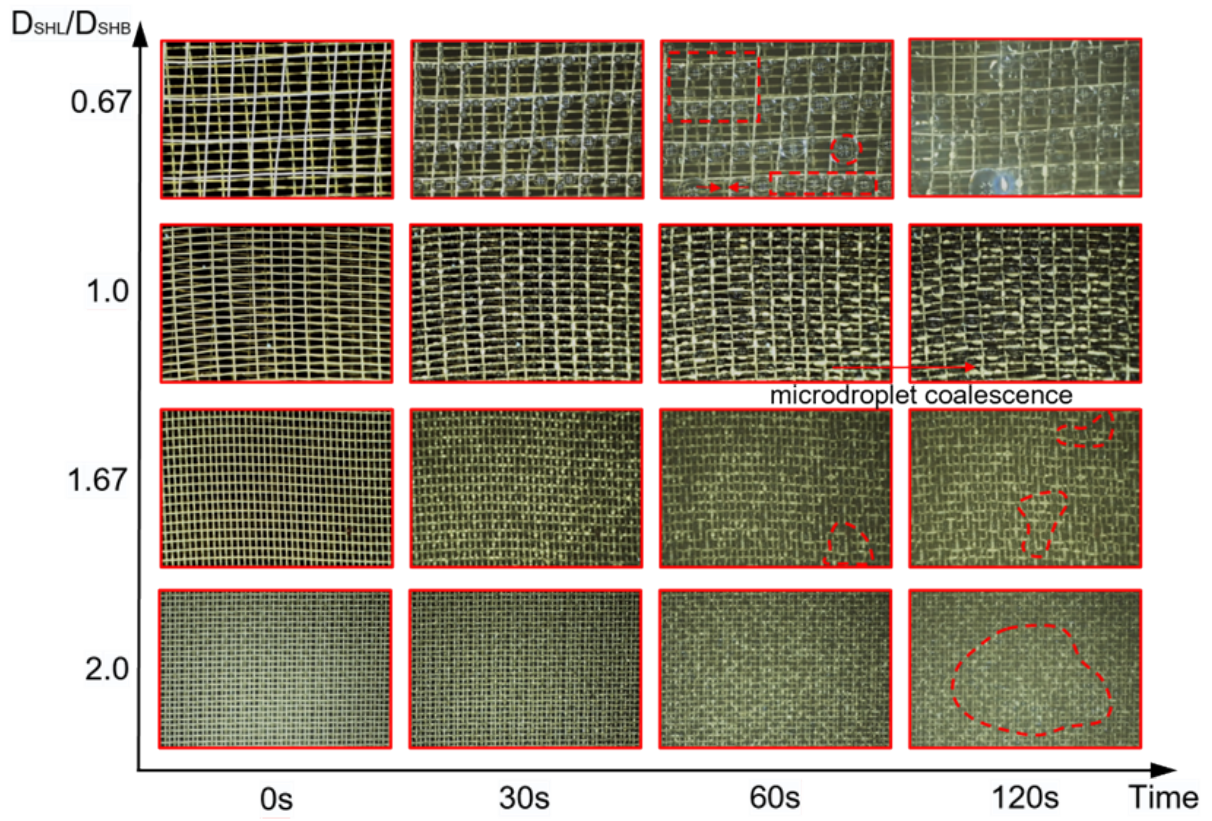

**Figure S6.** Droplet penetration behavior of samples with varying  $D_{SHL}/D_{SHB}$  ratios

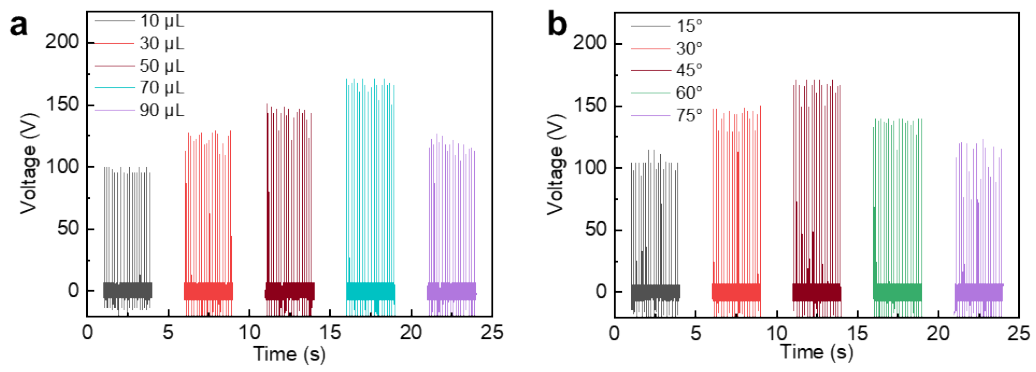

**Figure S7.** (a) Output voltage of the DEG impacted by droplets with different volume. (b) Output voltage of the DEG with different tilt angles.

**Supplementary Table S1-2**

**Table S1** The corresponding relationship between the wire diameter and mesh number

| <b>Mesh number</b> | <b>Wire diameter (mm)</b> |
|--------------------|---------------------------|
| 20                 | 0.20                      |
| 50                 | 0.15                      |
| 100                | 0.10                      |
| 150                | 0.06                      |
| 200                | 0.05                      |

**Table S2** Comparison of different fog collectors

| Layers | Materials              | Airflow transmission | Configurations                     | Airflow volume                         | WCR<br>( $\text{mg}\cdot\text{cm}^{-2}\cdot\text{h}^{-1}$ ) | References      |
|--------|------------------------|----------------------|------------------------------------|----------------------------------------|-------------------------------------------------------------|-----------------|
|        |                        |                      |                                    | (ml/h)/Flow velocity<br>(cm/s)/RH/TEMP |                                                             |                 |
| 1      | Copper                 | Impermeable          | Hybrid surfaces                    | 280/-/95%/27°C                         | 110.7                                                       | [27]            |
| 1      | PDMS                   | Impermeable          | Large-area SHB surfaces            | -/-/-                                  | 159                                                         | [28]            |
| 1      | Ti                     | Impermeable          | SHB hierarchical surfaces          | 312.12/-/28%/-                         | 543.4                                                       | [29]            |
| 1      | Glass                  | Impermeable          | SHL/SHB patterned surfaces         | 180/-/80%/20°C                         | 916.8                                                       | [26]            |
| 1      | Steel mesh             | Permeable            | Wettability-patterned meshes       | -/1.02/54%/24°C                        | 177.65                                                      | [32]            |
| 1      | Alloy wires            | Permeable            | Bio-inspired topological alloy net | -/0.45/90%/25°C                        | 1050                                                        | [31]            |
| 1      | PTFE                   | Permeable            | 3D vertical filament mesh          | 350/15/90%/23°C                        | 28.76                                                       | [30]            |
| 1      | Wire meshes            | Permeable            | Fog harps                          | 141/15/100%/room temperature           | ~3000                                                       | [7]             |
| 2      | PTFE sheet/Copper mesh | Impermeable          | Hybrid surface                     | -/10/-/20°C                            | 200                                                         | [11]            |
| 3      | Polyester mesh         | Permeable            | Sandwiched Janus nets              | -/100/60%/25°C                         | 370                                                         | [21]            |
| 3      | Brass mesh             | Permeable            | Sandwiched brass nets              | 150/40/50%/25°C                        | 1200                                                        | <b>Our work</b> |

## **Supplementary Video S1-2**

**Video S1** Droplet transfer from the SHB mesh to SHL mesh.

**Video S2** A fluent airflow pathway of the sandwiched fog collector.
